# Supplementary material for: Differential endothelial cell cycle status in postnatal retinal vessels revealed using a novel PIP-FUCCI reporter and zonation analysis
Source: PubMed Central journal article supplement — bioRxiv. 2024 Jan 5:2024.01.04.574239. Preprint. [Version 1] doi: 10.1101/2024.01.04.574239 (PMC10798646; doi:10.1101/2024.01.04.574239), 2024-01-05
Supplement: media-1.pdf [file media-1.pdf]

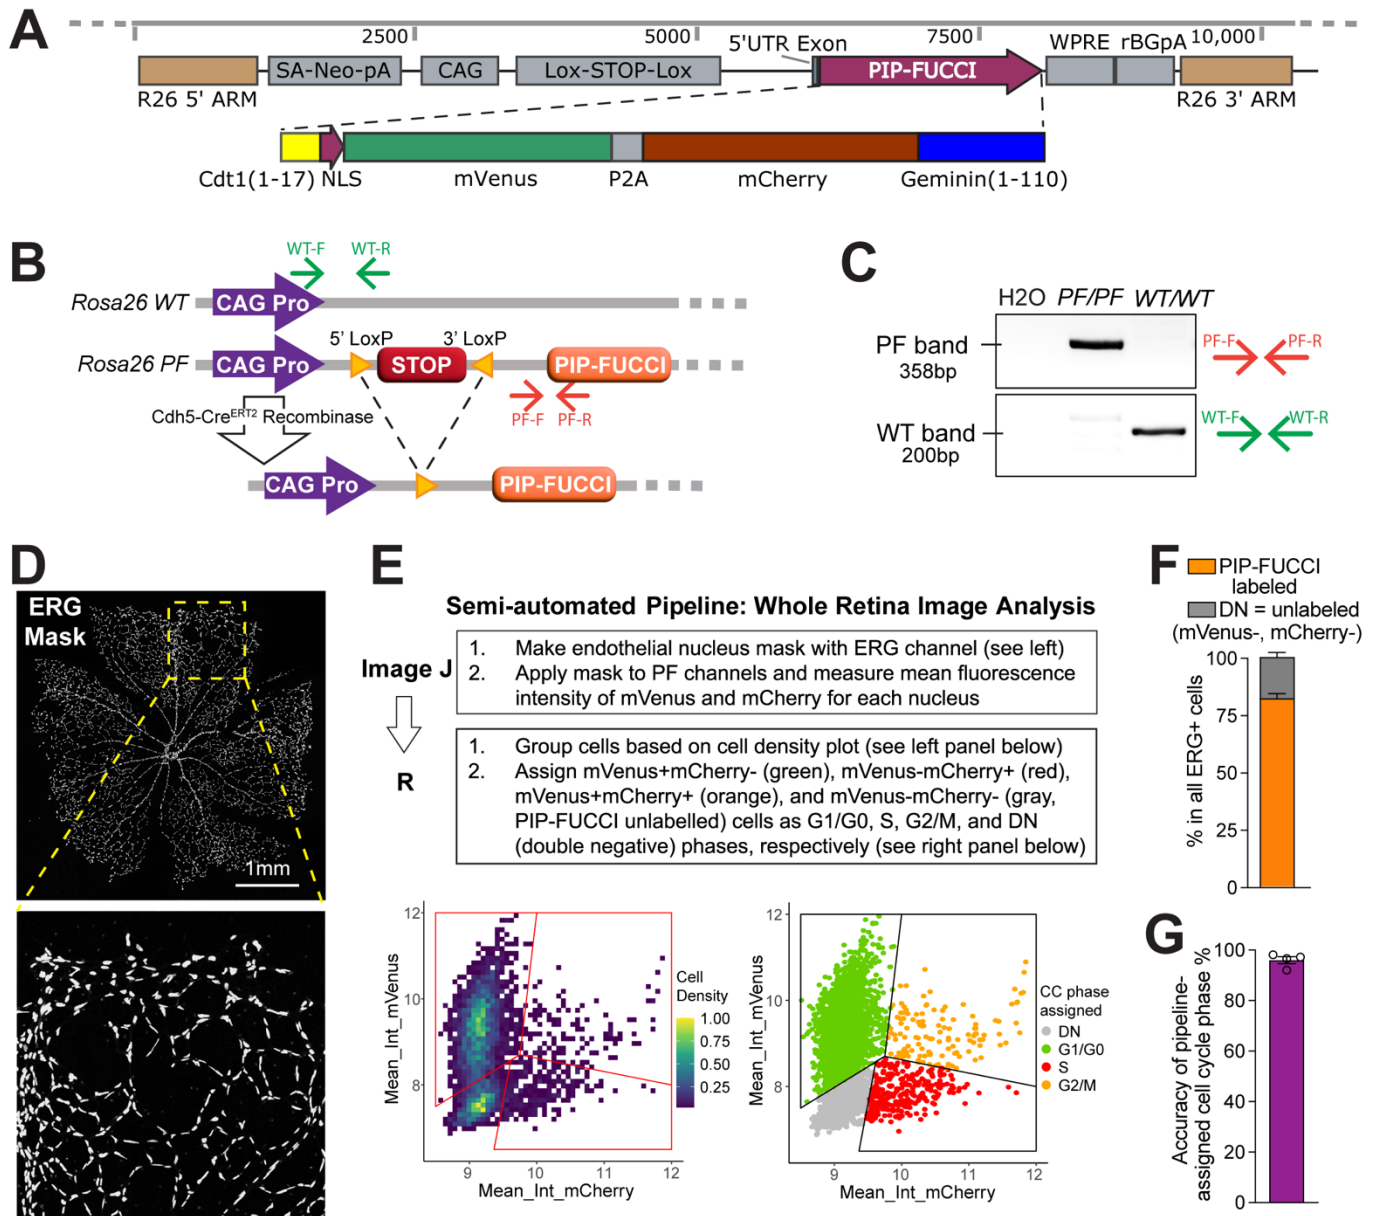

**Supplementary Figure 1. PIP-FUCCI reporter mice and workflow for retina analysis. (A)** Construct used to generate the PIP-FUCCI reporter mouse line. **(B)** Location of genotyping primers. **(C)** Example of genotyping results on DNA agarose gel. **(D)** Example of ERG mask. **(E)** Workflow for whole retina analysis with ERG mask. **(F)** Quantification of % PIP-FUCCI labeled cells in ERG+ endothelial cells from two *PF/PF;Cdh5-Cre<sup>ERT2</sup>/+* retinas. **(G)** Accuracy of manual vs. algorithm-assigned cell cycle phases from the same subset of endothelial cells of the same retinal images (PIP-FUCCI labeled and stained for IB4 and ERG). N = 4 pups.

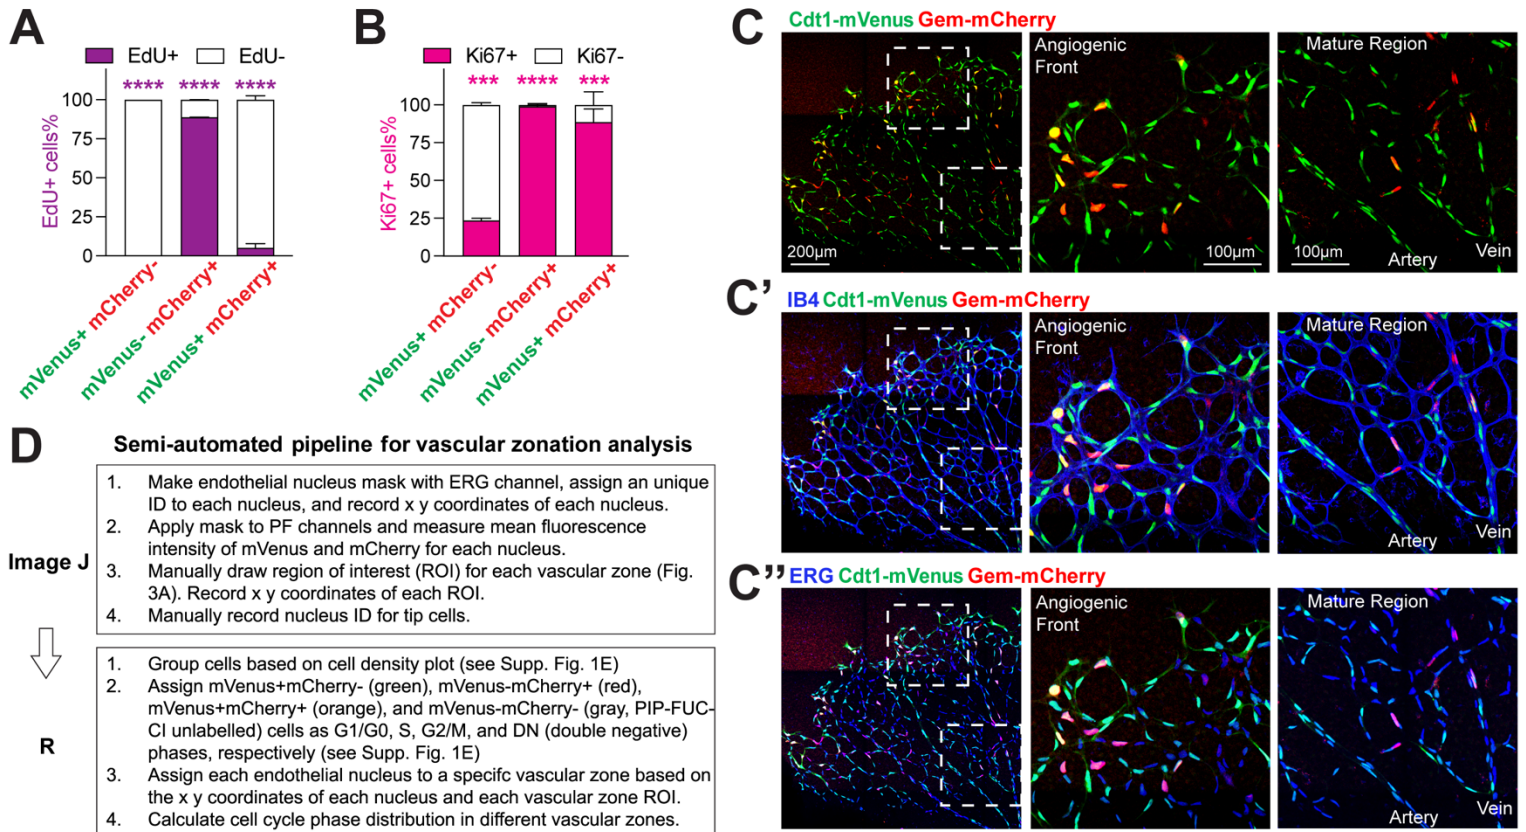

### Supplementary Figure 2. Workflow for vascular zonation analysis of the retina.

**(A)** Quantification of retinal endothelial cells EdU labeled relative to PIP-FUCCI status (related to **Fig. 2D-F**).  $n = 3$  pups. \*\*\*\*  $p < 0.0001$  by Two-way ANOVA & Sidak's multiple comparisons test. **(B)** Quantification Ki67+ retinal endothelial cells relative to PIP-FUCCI status (related to **Fig. 2G-I**).  $n = 2$  pups. \*\*\*\*  $p < 0.0001$ , \*\*\*  $p < 0.001$  by Two-way ANOVA & Sidak's multiple comparisons test. **(C-C'')** High resolution view of one representative leaflet of a *PF/PF;Cdh5-Cre<sup>ERT2/+</sup>* retina stained for IB4 and ERG. Boxed areas on far left (scale bar, 200  $\mu$ m) magnified (scale bar 100  $\mu$ m on middle (AFC) and far right (MC) regions). **(D)** Workflow for semi-automated vascular zonation analysis of PIP-FUCCI retinal images with ERG mask.

**SUPPLEMENTARY TABLES****Supplementary Table 1. PCR Primers**

| <b>Primer Name</b> | <b>Primer Sequence</b>  | <b>Expected Products</b> |
|--------------------|-------------------------|--------------------------|
| Rosa26 WT-F        | TGGAGTTGCAGATCACGAGG    | WT = 225 bp              |
| Rosa26 WT-R        | TGTTTTGGAGGCAGGAAGCA    | PF = no band             |
| Rosa26 PF-F        | GCTAACCATGTTTCATGCCTTC  | WT = no band             |
| Rosa26 PF-R        | CGCCCTCGCCGGACACGCTGAAC | PF = 357 bp              |
| GenCre F           | GACCAGGTTTCGTTCACTCA    | WT = no band             |
| GenCre R           | TAGCGCCGTAAATCAAT       | Cre = 400 bp             |

**Supplementary Table 2. Antibodies**

| <b>Antibody</b>    | <b>Species</b> | <b>Company</b> | <b>Catalog No.</b> | <b>Dilution</b> | <b>Final Conc</b> |
|--------------------|----------------|----------------|--------------------|-----------------|-------------------|
| IsolectinB4-biotin | NA             | ThermoFisher   | I21414             | 1:100           | 10 µg/ml          |
| Streptavidin-Alexa | NA             | ThermoFisher   | S32351             | 1:50            | 20 µg/ml          |
| Ki67-Alexa647      | Rat            | Biolegend      | 652407             | 1:20            | 25 µg/ml          |
| ERG-Alexa647       | Rabbit         | Abcam          | ab196149           | 1:100           | 5 µg/ml           |
| DAPI               | NA             | Sigma          | 10236276001        | 1:1,000         | 10 ng/ml          |
